# Supplementary material
Source: Springer Nature journal article supplement (https://www.springermedizin.de/resource/supplementary/12905_2007_125_MOESM5_ESM.pdf/9519178)

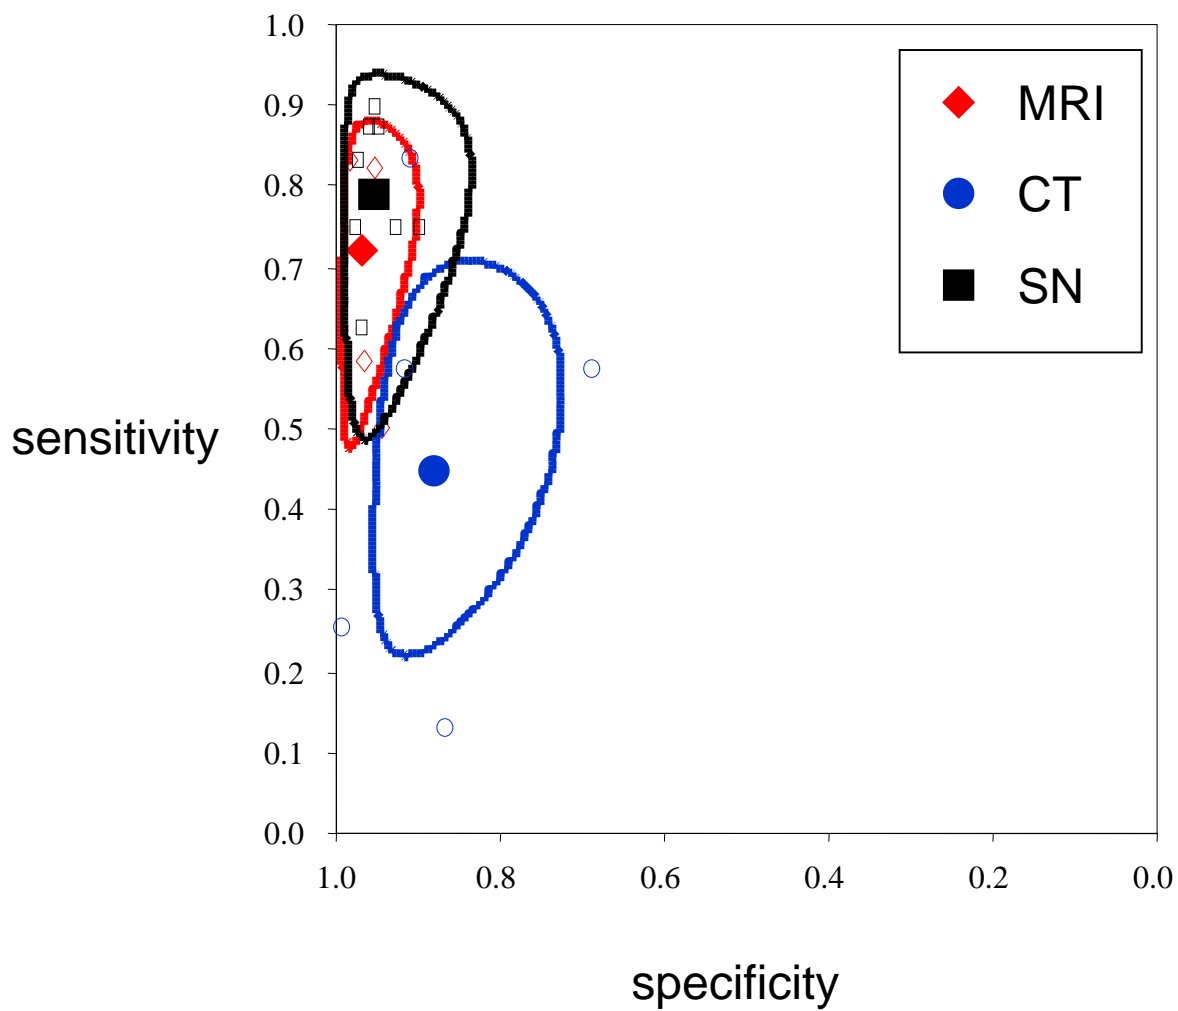

Supplement: MOESM5 [file 9519178]
